# Supplementary material for: A strain induced polar metal phase in a ferromagnetic Fe3GeTe2 monolayer
Source: Royal Society of Chemistry journal article supplement (doi:10.1039/d3cp01616a), 2023-01-01
Supplement: d3cp01616a1.pdf [file d3cp01616a1.pdf]

## Supporting Information

### Strain Induced Polar Metal Phase in Ferromagnetic $\text{Fe}_3\text{GeTe}_2$

#### Monolayer

Xiaoyan Miao,<sup>a</sup> Si Li,<sup>a,b</sup> Zhenyi Jiang,<sup>a</sup> Chunmei Zhang, \*<sup>a</sup> and Aijun Du<sup>c</sup>

<sup>a</sup> School of Physics, Northwest University, Xi'an 710127, China. E-mail:

[chunmeizhang@nwu.edu.cn](mailto:chunmeizhang@nwu.edu.cn)

<sup>b</sup> Shaanxi Key Laboratory for Theoretical Physics Frontiers, Xi'an 710127, China

<sup>c</sup> School of Chemistry and Physics, Queensland University of Technology, Gardens Point Campus, Brisbane, QLD 4001, Australia

## I. Thermodynamic stability of the polarized structure of FGT monolayer under strain.

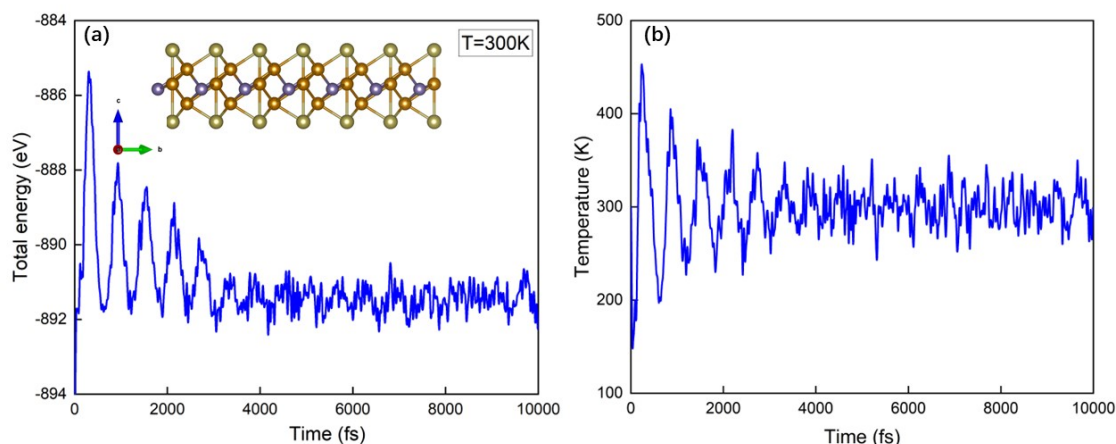

Fig. S1. The total energy of the FGT monolayer in 5x5x1 supercell at 300 K, and the side view of the FGT monolayer with  $\sigma=-5\%$  in the inset. (b) The variation of temperature with time.

By means of DFT, we create a  $5 \times 5 \times 1$  supercell to take molecular dynamics simulations. From Fig. S1a, the total energy of the FGT monolayer keeps in a stable range at 300K. Meanwhile, the inset of Fig. S1a shows the side view structure of the FGT monolayer under  $\sigma=-5\%$ . We can find a clear polarization of the structure, with the Fe<sub>II</sub> and Ge atoms having a relative displacement along the z direction. So, through the analyses, we conclude that the polarization under compressive strain is stable under room temperature.

## II. The charge of lost and gain of different atoms under compressive strain.

The quantities of the charge from  $\sigma=0\%$  to  $\sigma=-7\%$  for Fe<sub>I</sub> and Fe<sub>II</sub> atoms increase 0.007 and 0.140, respectively. In contrast, the quantity of charge in Fe<sub>I</sub> decreases 0.134. As for Ge atom, the charge values of Ge have a clearly reduce,  $\sim 0.19$ . When it comes to Te atom, we show that the quantity of the charge in Te<sub>I</sub> and Te<sub>I'</sub> increases 0.25 and decreases 0.06 respectively.

## III. The charge density distribution along Z direction.

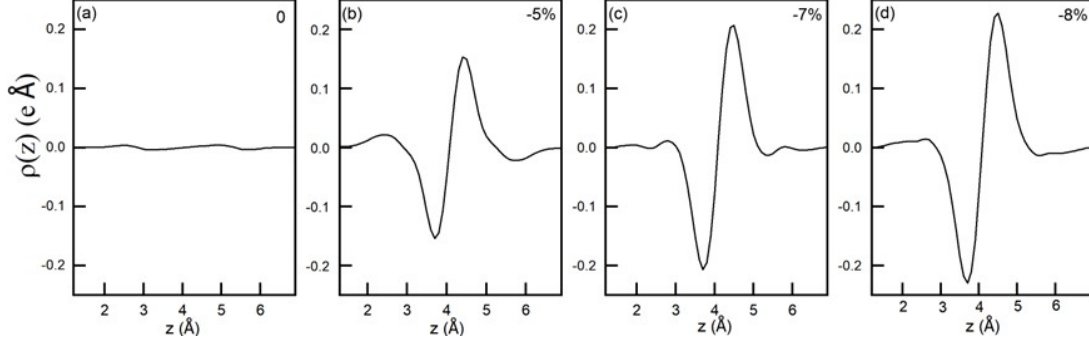

Fig. S2. The charge density distribution of FGT monolayer along  $z$  direction. (a-d) correspond to  $\sigma=0\%$ ,  $-5\%$ ,  $-7\%$ ,  $-8\%$ , respectively.

Fig. S2 represent the charge density distribution of FGT monolayer along  $z$  direction under compressive strain. We find that the electronic contribution to the polarization increases with  $|\sigma|$ .

#### IV. The exchange coupling parameter analysis under strain.

Table. S1. The exchange coupling parameters of FGT and the parameters related to its under strain. The  $J_1$ ,  $J_2$ ,  $J_3$  show the different interactions between Fe atoms, first-, second- and third-nearest neighbor interactions,  $J_1$ ,  $J_2$ ,  $J_3$  are direct exchange of  $\text{Fe}_I$  and  $\text{Fe}_{I'}$ ,  $\text{Fe}_I$  and  $\text{Fe}_{II}$ , and  $\text{Fe}_{I'}$  and  $\text{Fe}_{I'}$ , respectively.

|                                             | $\sigma=0\%$ | $\sigma=-7\%$ |
|---------------------------------------------|--------------|---------------|
| $E_0/(\text{eV})$                           | 0            | 0             |
| $E_{\text{FM}}/(\text{eV})$                 | -1.588       | -0.556        |
| $E_{\text{AFM1}}/(\text{eV})$               | -0.977       | -0.492        |
| $E_{\text{AFM2}}/(\text{eV})$               | -1.084       | -0.492        |
| $J_1/(\text{meV})$                          | 60.55        | -3.33         |
| $J_2/(\text{meV})$                          | -39.17       | 79.44         |
| $J_3/(\text{meV})$                          | 0.256        | -14.08        |
| $\text{Fe}_I\text{-Fe}_{I'}(\text{\AA})$    | 2.467        | 2.699         |
| $\text{Fe}_I\text{-Fe}_{II}(\text{\AA})$    | 2.630        | 2.402         |
| $\text{Fe}_{I'}\text{-Fe}_{I'}(\text{\AA})$ | 4.024        | 3.743         |

Through the analysis, we find that when  $\sigma = 0\%$ ,  $J_1$  and  $J_3$  are positive indicating the exchange couplings are FM, while the exchange parameter of  $J_2$  is AFM.  $J_1$  is bigger than  $J_2$  and  $J_3$ , showing that the magnetic ground state relies on the magnetic exchange coupling between  $\text{Fe}_I$  and  $\text{Fe}_T$ . Under compressive strain, the  $J_1$ ,  $J_2$  and  $J_3$  change distinctly. When  $\sigma = -7\%$ ,  $J_2$  is positive, while  $J_1$  and  $J_3$  becomes negative. Both  $J_1$  and  $J_3$  are smaller than  $J_2$ . This shows that the ground state of FGT monolayer is still FM, but it depends on the second-nearest neighbors coupling. According to the above analysis, the second-nearest neighbors and third-nearest neighboring coupling affect the ground state properties of the FGT monolayer and external strain alters the exchange coupling of the FGT monolayer.

### V. The position of $\text{Fe}_{II}$ and Ge with respect to uniaxial strain.

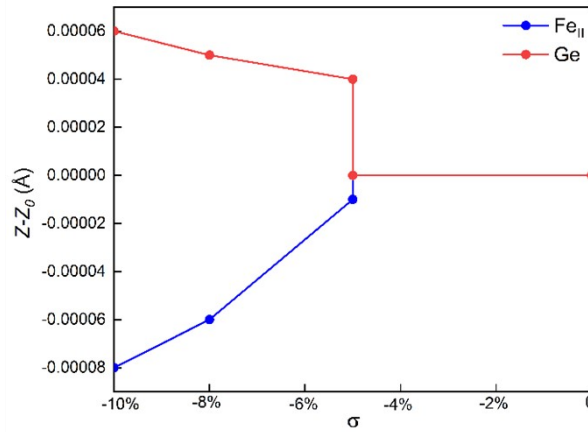

Fig. S3. Uniaxial strain-induced  $\text{Fe}_{II}$  and Ge atoms deviation from the center along  $z$  direction.  $Z_0$  is the initial position of  $\text{Fe}_{II}$  and Ge with  $\sigma = 0\%$ .  $Z$  is the position of  $\text{Fe}_{II}$  and Ge along the  $c$  axis under strain.  $Z - Z_0$  is the value relative to  $\sigma = 0\%$ .

We calculate the polarization value changes of FGT under uniaxial strain. We find that when the uniaxial strain is  $-5\%$ , the polarization value of FGT is  $-2.392 \text{ e}\text{\AA}/\text{per unit cell}$ . When the strain turns to  $-7\%$ , the polarization value becomes  $-2.656 \text{ e}\text{\AA}/\text{per unit cell}$ . As the strain increases, the polarization value is also increased. Compared with the biaxial strain, the uniaxial strain results in a significantly larger polarization value. Moreover, we observe that the polarization direction induced by the uniaxial strain is opposite to that of the biaxial strain.
